# Supplementary material
Source: PubMed Central journal article supplement (PMC5603376)

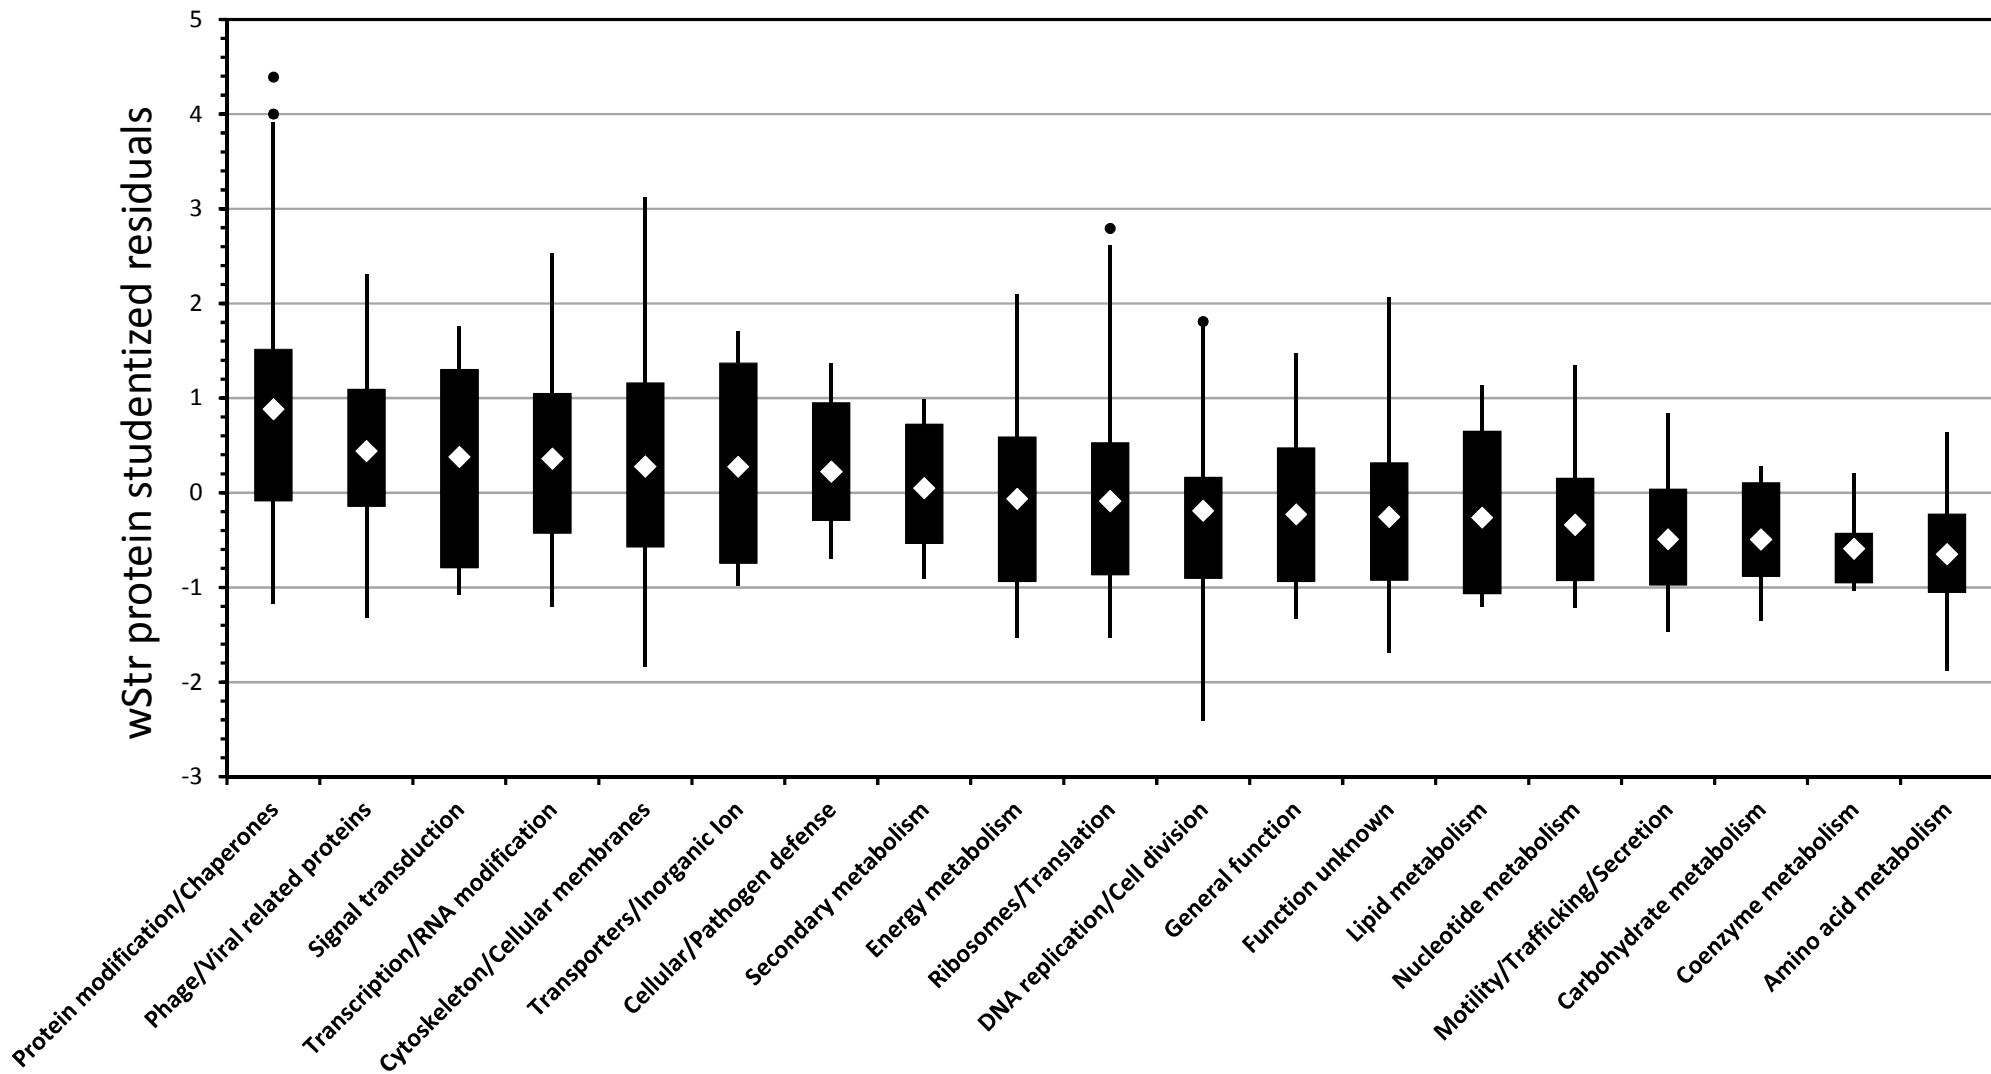

Supplement: NIHMS870089-supplement-1.pdf [file NIHMS870089-supplement-1.pdf]
